# Supplementary material for: Singapore’s Total Diet Study (2021–2023): Study Design, Methodology, and Relevance to Ensuring Food Safety
Source: MDPI journal article supplement (doi:10.3390/foods13040511), 2024-02-06
Supplement: s1 [file s1]

# Supporting Information

**Table S1.** Glossary of terms used for food preparation and cooking

| Term         | Definition                                                                                                                                                                                                                                                         |
|--------------|--------------------------------------------------------------------------------------------------------------------------------------------------------------------------------------------------------------------------------------------------------------------|
| Homogenise   | Using a blender, blend and mix until a homogeneous mixture is obtained.                                                                                                                                                                                            |
| Mix          | For liquid foods. Thoroughly stir the mixture of liquids into a consistent, indistinguishable layer.                                                                                                                                                               |
| Blanch       | Cook in boiling water for 2 minutes (unless otherwise stated). Transfer to ice water immediately, drain immediately once cooled to 25°C.                                                                                                                           |
| Boil         | Cook using boiling water.                                                                                                                                                                                                                                          |
| Rinse        | Lightly wash with water at room temperature to remove residues of dirt or impurities.                                                                                                                                                                              |
| Wash         | Thoroughly wash foods with water at room temperature to remove dirt and impurities.                                                                                                                                                                                |
| Drain        | Remove excess liquid using a colander.                                                                                                                                                                                                                             |
| Pan fry      | Fry foods in frying pan on an induction cooker/ gas burner, using low to medium heat. Prior to frying, coat bottom of pan with a thin layer of oil (approximately 1 tablespoon) and heat up.                                                                       |
| Stir fry     | Fry foods in frying pan on an induction cooker/ gas burner, using medium heat (150°C) (unless otherwise specified) with frequent stirring and turning over. Prior to frying, coat bottom of pan with a thin layer of oil (approximately 1 tablespoon) and heat up. |
| Bake         | Cook food in oven using convectional dry heat from 150 – 200°C                                                                                                                                                                                                     |
| Brew         | Mix coffee powder with hot water at 95 – 100°C                                                                                                                                                                                                                     |
| Braise       | Cook large pieces of food submerged in a liquid till tender                                                                                                                                                                                                        |
| Deep fry     | Cook food submerged in large amounts of oil at 150 – 180°C                                                                                                                                                                                                         |
| Grill        | Cook food over a griller with intense heat                                                                                                                                                                                                                         |
| Half-boil    | Cook eggs submerged in hot water at 95 – 100°C                                                                                                                                                                                                                     |
| Reconstitute | Add water to rehydrate to original state                                                                                                                                                                                                                           |
| Roast        | Cook food in oven using convectional dry heat from 180 – 200°C                                                                                                                                                                                                     |
| Soup         | Boil a food with water for a prolonged period of time                                                                                                                                                                                                              |
| Steam        | Cook food using steam as the mode of heat transfer at 100°C                                                                                                                                                                                                        |
| Stew         | Cook small pieces of food submerged in a liquid till tender                                                                                                                                                                                                        |

**Table S2.** Limits of detection (LODs) and quantification (LOQs) for test methods used in Singapore's TDS

| Chemical class                        | Chemical compound                                                                         | Limit of Detection (ppb)                             | Limit of Quantitation / Reporting Limit (ppb)       | Method of determination                                          |
|---------------------------------------|-------------------------------------------------------------------------------------------|------------------------------------------------------|-----------------------------------------------------|------------------------------------------------------------------|
| Heavy metals                          | Arsenic                                                                                   | 5                                                    | 15                                                  | Standard deviation of the response and slope (LOD: 3.3, LOQ: 10) |
|                                       | Arsenic, inorganic                                                                        | 30 (dry samples)<br>10 (wet samples)                 | 90 (dry samples)<br>30 (wet samples)                |                                                                  |
|                                       | Aluminium                                                                                 | 100                                                  | 300                                                 |                                                                  |
|                                       | Antimony                                                                                  | 5                                                    | 15                                                  |                                                                  |
|                                       | Cadmium                                                                                   | 5                                                    | 15                                                  |                                                                  |
|                                       | Chromium                                                                                  | 5                                                    | 15                                                  |                                                                  |
|                                       | Lead                                                                                      | 5                                                    | 15                                                  |                                                                  |
|                                       | Mercury                                                                                   | 10                                                   | 30                                                  |                                                                  |
|                                       | Methylmercury                                                                             | 50                                                   | 150                                                 |                                                                  |
|                                       | Nickel                                                                                    | 5                                                    | 15                                                  |                                                                  |
|                                       | Selenium                                                                                  | 10                                                   | 30                                                  |                                                                  |
|                                       | Tin                                                                                       | 10                                                   | 30                                                  |                                                                  |
| Mycotoxins                            | Zearalenone & its derivatives                                                             | 2                                                    | 5                                                   | Signal-to-noise ratio (3:1 for LOD, 10:1 for LOQ)                |
|                                       | Fumonisin B1, B2                                                                          | 2                                                    | 5                                                   |                                                                  |
|                                       | Aflatoxin B1, G1                                                                          | 0.025                                                | 0.075                                               |                                                                  |
|                                       | Aflatoxin B2, G2                                                                          | 0.0625                                               | 0.01875                                             |                                                                  |
|                                       | Aflatoxin M1, M2                                                                          | 0.03 (general)<br>0.01 (liq. milk, reconst. formula) | 0.1 (general)<br>0.03 (liq. milk, reconst. formula) |                                                                  |
|                                       | Ergot alkaloids                                                                           | 0.3                                                  | 1                                                   |                                                                  |
|                                       | DON & its derivatives (15-acetyl-deoxynivalenol, 3-acetyl-deoxynivalenol, Deoxynivalenol) | 2.5                                                  | 5                                                   |                                                                  |
|                                       | Ochratoxin A                                                                              | 0.05                                                 | 0.1                                                 |                                                                  |
| Phytotoxins (Pyrrolizidine alkaloids) | Echimidine                                                                                | 0.34                                                 | 1                                                   |                                                                  |
|                                       | Echimidine-N-Oxide                                                                        | 0.34                                                 | 1                                                   |                                                                  |
|                                       | Heliotrine                                                                                | 0.34                                                 | 1                                                   |                                                                  |
|                                       | Heliotrine-N-oxide                                                                        | 0.34                                                 | 1                                                   |                                                                  |
|                                       | Intermedine                                                                               | 0.34                                                 | 1                                                   |                                                                  |
|                                       | Intermedine-N-oxide                                                                       | 0.34                                                 | 1                                                   |                                                                  |
|                                       | Lasiocarpine                                                                              | 0.34                                                 | 1                                                   |                                                                  |
|                                       | Lasiocarpine-N-oxide                                                                      | 0.34                                                 | 1                                                   |                                                                  |
|                                       | Lycopsamine                                                                               | 0.34                                                 | 1                                                   |                                                                  |

| Chemical class                                            | Chemical compound                     | Limit of Detection (ppb) | Limit of Quantitation / Reporting Limit (ppb) | Method of determination                                          |
|-----------------------------------------------------------|---------------------------------------|--------------------------|-----------------------------------------------|------------------------------------------------------------------|
|                                                           | Lycopsamine-N-oxide                   | 0.34                     | 1                                             |                                                                  |
|                                                           | Monocrotaline                         | 0.34                     | 1                                             |                                                                  |
|                                                           | Monocrotaline-N-oxide                 | 0.34                     | 1                                             |                                                                  |
|                                                           | Retrorsine                            | 0.34                     | 1                                             |                                                                  |
|                                                           | Retrorsine-N-oxide                    | 3.4                      | 10                                            |                                                                  |
|                                                           | Riddelline                            | 0.34                     | 1                                             |                                                                  |
|                                                           | Riddelline-N-Oxide                    | 3.4                      | 10                                            |                                                                  |
|                                                           | Senecionine                           | 0.34                     | 1                                             |                                                                  |
|                                                           | Senecionine-N-oxide                   | 0.34                     | 1                                             |                                                                  |
|                                                           | Seneciphylline                        | 0.34                     | 1                                             |                                                                  |
|                                                           | Seneciphylline-N-oxide                | 0.34                     | 1                                             |                                                                  |
|                                                           | Senkirkine                            | 0.34                     | 1                                             |                                                                  |
|                                                           | Trichodesmine                         | 0.34                     | 1                                             |                                                                  |
| Phytotoxins (Tropane alkaloids)                           | Atropine                              | 0.3                      | 0.9                                           |                                                                  |
|                                                           | Scopolamine                           | 0.3                      | 0.9                                           |                                                                  |
| Pesticide residues                                        | Dithiocarbamates                      | 0                        | 20                                            | Signal-to-noise ratio (3:1 for LOD, 10:1 for LOQ)                |
|                                                           | ETU                                   | 10                       | 20                                            |                                                                  |
|                                                           | PTU                                   | 10                       | 10                                            |                                                                  |
|                                                           | Multi-residues                        | 0                        | 5 - 10                                        |                                                                  |
| Processed contaminants (Chloropropanols)                  | 3-Monochloropropane-1,2-diol (3-MCPD) | 1                        | 3                                             | Standard deviation of the response and slope (LOD: 3.3, LOQ: 10) |
| Processed contaminants (Heterocyclic aromatic amines)     | 4,8-DiMeIQx                           | 0.03                     | 0.1                                           |                                                                  |
|                                                           | AαC                                   | 0.03                     | 0.1                                           |                                                                  |
|                                                           | Harman                                | 0.03                     | 0.1                                           |                                                                  |
|                                                           | IQ                                    | 0.03                     | 0.1                                           |                                                                  |
|                                                           | MeIQ                                  | 0.03                     | 0.1                                           |                                                                  |
|                                                           | MeIQx                                 | 0.03                     | 0.1                                           |                                                                  |
|                                                           | Norharman                             | 0.03                     | 0.1                                           |                                                                  |
|                                                           | PhIP                                  | 0.03                     | 0.1                                           |                                                                  |
| Processed contaminants (Polycyclic aromatic hydrocarbons) | Benz(a)anthracene                     | 0.15                     | 0.5                                           | Signal-to-noise ratio (3:1 for LOD, 10:1 for LOQ)                |
|                                                           | Benzo(a)pyrene                        | 0.15                     | 0.5                                           |                                                                  |
|                                                           | Benzo(b)fluoranthene                  | 0.15                     | 0.5                                           |                                                                  |
|                                                           | Chrysene                              | 0.15                     | 0.5                                           |                                                                  |
| Processed contaminants (Furan compounds)                  | 2-methylfuran                         | 0.3                      | 1                                             | Standard deviation of the response and slope (LOD: 3.3, LOQ: 10) |
|                                                           | Furan                                 | 0.3                      | 1                                             |                                                                  |
|                                                           | N-Nitrosodibutylamine (NDBA)          | 0.3                      | 1                                             |                                                                  |

| Chemical class                                             | Chemical compound                                 | Limit of Detection (ppb) | Limit of Quantitation / Reporting Limit (ppb) | Method of determination                                          |
|------------------------------------------------------------|---------------------------------------------------|--------------------------|-----------------------------------------------|------------------------------------------------------------------|
| Processed contaminants (Nitrosamines)                      | N-Nitrosodiethylamine (NDEA)                      | 0.3                      | 1                                             | Signal-to-noise ratio (3:1 for LOD, 10:1 for LOQ)                |
|                                                            | N-Nitrosodimethylamine (NDMA)                     | 0.3                      | 1                                             |                                                                  |
|                                                            | N-Nitrosomorpholine (NMOR)                        | 0.3                      | 1                                             |                                                                  |
|                                                            | N-Nitrosopiperidine (NPIP)                        | 0.3                      | 1                                             |                                                                  |
|                                                            | N-Nitrosopyrrolidine (NPYR)                       | 0.3                      | 1                                             |                                                                  |
| Persistent organic pollutants (Dioxins (PCDDs/PCDFs/PCBs)) | 1,2,3,4,6,7,8-Heptachlorodibenzo-p-dioxin (HpCDD) | 0.0010                   | 0.0030                                        | Standard deviation of the response and slope (LOD: 3.3, LOQ: 10) |
|                                                            | 1,2,3,4,6,7,8-Heptachlorodibenzofuran (HpCDF)     | 0.0010                   | 0.0030                                        |                                                                  |
|                                                            | 1,2,3,4,7,8,9-Heptachlorodibenzofuran (HpCDF)     | 0.0010                   | 0.0031                                        |                                                                  |
|                                                            | 1,2,3,4,7,8-Hexachlorodibenzo-p-dioxin (HxCDD)    | 0.0004                   | 0.0013                                        |                                                                  |
|                                                            | 1,2,3,4,7,8-Hexachlorodibenzofuran (HxCDF)        | 0.0003                   | 0.0010                                        |                                                                  |
|                                                            | 1,2,3,6,7,8-Hexachlorodibenzo-p-dioxin (HxCDD)    | 0.0004                   | 0.0011                                        |                                                                  |
|                                                            | 1,2,3,6,7,8-Hexachlorodibenzofuran (HxCDF)        | 0.0004                   | 0.0011                                        |                                                                  |
|                                                            | 1,2,3,7,8,9-Hexachlorodibenzo-p-dioxin (HxCDD)    | 0.0004                   | 0.0012                                        |                                                                  |
|                                                            | 1,2,3,7,8,9-Hexachlorodibenzofuran (HxCDF)        | 0.0004                   | 0.0012                                        |                                                                  |
|                                                            | 1,2,3,7,8-Pentachlorodibenzo-p-dioxin (PeCDD)     | 0.0002                   | 0.0006                                        |                                                                  |
|                                                            | 1,2,3,7,8-Pentachlorodibenzofuran (PeCDF)         | 0.0003                   | 0.0009                                        |                                                                  |
|                                                            | 2,3,4,6,7,8-Hexachlorodibenzofuran (HxCDF)        | 0.0003                   | 0.0010                                        |                                                                  |
|                                                            | 2,3,4,7,8-Pentachlorodibenzofuran (PeCDF)         | 0.0002                   | 0.0006                                        |                                                                  |
|                                                            | 2,3,7,8-Tetrachlorodibenzo-p-dioxin (TCDD)        | 0.0002                   | 0.0006                                        |                                                                  |
|                                                            | 2,3,7,8-Tetrachlorodibenzofuran (TCDF)            | 0.0002                   | 0.0005                                        |                                                                  |

| Chemical class                                           | Chemical compound                                 | Limit of Detection (ppb) | Limit of Quantitation / Reporting Limit (ppb) | Method of determination                           |
|----------------------------------------------------------|---------------------------------------------------|--------------------------|-----------------------------------------------|---------------------------------------------------|
|                                                          | 1,2,3,4,5,6,7,8-Octachlorodibenzo-p-dioxin (OCDD) | 0.0119                   | 0.0361                                        |                                                   |
|                                                          | 1,2,3,4,5,6,7,8-Octachlorodibenzofuran (OCDF)     | 0.0096                   | 0.0290                                        |                                                   |
|                                                          | PCB congener 101                                  | 0.0212                   | 0.0636                                        |                                                   |
|                                                          | PCB congener 105                                  | 0.0126                   | 0.0381                                        |                                                   |
|                                                          | PCB congener 114                                  | 0.0159                   | 0.0482                                        |                                                   |
|                                                          | PCB congener 118                                  | 0.0179                   | 0.0541                                        |                                                   |
|                                                          | PCB congener 123                                  | 0.0118                   | 0.0359                                        |                                                   |
|                                                          | PCB congener 126                                  | 0.0018                   | 0.0055                                        |                                                   |
|                                                          | PCB congener 138                                  | 0.0202                   | 0.0605                                        |                                                   |
|                                                          | PCB congener 153                                  | 0.0205                   | 0.0614                                        |                                                   |
|                                                          | PCB congener 156                                  | 0.0173                   | 0.0524                                        |                                                   |
|                                                          | PCB congener 157                                  | 0.0146                   | 0.0443                                        |                                                   |
|                                                          | PCB congener 167                                  | 0.0143                   | 0.0434                                        |                                                   |
|                                                          | PCB congener 169                                  | 0.0031                   | 0.0095                                        |                                                   |
|                                                          | PCB congener 180                                  | 0.0324                   | 0.0971                                        |                                                   |
|                                                          | PCB congener 189                                  | 0.0131                   | 0.0398                                        |                                                   |
|                                                          | PCB congener 28                                   | 0.0195                   | 0.0584                                        |                                                   |
|                                                          | PCB congener 52                                   | 0.0173                   | 0.0519                                        |                                                   |
|                                                          | PCB congener 77                                   | 0.0023                   | 0.0070                                        |                                                   |
|                                                          | PCB congener 81                                   | 0.0024                   | 0.0072                                        |                                                   |
| Persistent organic pollutants (Perfluorinated compounds) | Perfluorohexanesulfonic acid (PFHxS)              | 0.3                      | 1                                             |                                                   |
|                                                          | Perfluorononanoic acid (PFNA)                     | 0.3                      | 1                                             |                                                   |
|                                                          | Perfluorooctanesulfonate acid (PFOS)              | 0.3                      | 1                                             |                                                   |
|                                                          | Perfluorooctanoic acid (PFOA)                     | 0.3                      | 1                                             |                                                   |
|                                                          | PFAS (in water)                                   | 0.015                    | 0.05                                          |                                                   |
| Food contact chemicals (Bisphenols)                      | Bisphenol A                                       | 0.6                      | 2                                             | Signal-to-noise ratio (3:1 for LOD, 10:1 for LOQ) |
|                                                          | Bisphenol A diglycidyl ether                      | 0.6                      | 2                                             |                                                   |
|                                                          | Bisphenol S                                       | 0.6                      | 2                                             |                                                   |
| Food contact chemicals (Plasticisers)                    | Butyl benzyl phthalate (BBP)                      | 30                       | 100                                           |                                                   |
|                                                          | Di-2-ethylhexyl adipate (DEHA)                    | 30                       | 100                                           |                                                   |
|                                                          | Di-2-ethylhexyl phthalate (DEHP)                  | 30                       | 100                                           |                                                   |
|                                                          | Di-butyl phthalate (DBP)                          | 30                       | 100                                           |                                                   |
|                                                          | Di-iso-decyl phthalate (DIDP)                     | 100                      | 300                                           |                                                   |
|                                                          | Di-iso-nonyl phthalate (DINP)                     | 100                      | 300                                           |                                                   |
|                                                          | Di-n-decyl phthalate (DNBP)                       | 30                       | 100                                           |                                                   |
|                                                          | Di-n-octyl phthalate (DNOP)                       | 30                       | 100                                           |                                                   |

**Table S3.** Method validation parameters for test methods used in this study  
<Refer to attachment>

**Table S4.** Foods and beverages with the accompanying consumption amounts of the population  
<Refer to attachment>

**Table S5.** Commonly adopted cooking methods for selected foods, obtained through the survey

| <b>Food</b>     | <b>Commonly adopted cooking methods<sup>1</sup></b>  |
|-----------------|------------------------------------------------------|
| Rice, white     | Steam (62%), Boil (27%), Fry (5%)                    |
| Noodles, yellow | Boil (62%), Stir fry (30%)                           |
| Chicken, breast | Boil (26%), Stir fry (22%), Steam (18%), Roast (10%) |
| Chicken, wing   | Deep fry (57%), Stir fry (12%)                       |
| Pork, belly     | Stir fry (36%), Boil (21%), Braise (13%)             |
| Duck            | Braise (32%), Roast (27%), Boil (18%)                |
| Cod             | Steam (76%), Boil (12%)                              |
| Broccoli        | Stir fry (56%), Boil (30%)                           |
| Lettuce         | No preparation (80%), Boil (13%)                     |
| Spinach         | Stir fry (51%), Boil (38%)                           |

<sup>1</sup> Totals may not sum to 100% as cooking methods less than 5% are not shown here

**Table S6.** Food-cooking method combinations for foods that require cooking

| <b>Food category</b>  | <b>Food</b>                   | <b>Cooking method</b> |
|-----------------------|-------------------------------|-----------------------|
| Brassica vegetables   | Broccoli                      | Boil                  |
| Brassica vegetables   | Broccoli                      | Stir fry              |
| Brassica vegetables   | Cabbage                       | Boil                  |
| Brassica vegetables   | Cabbage                       | Stir fry              |
| Brassica vegetables   | Cauliflower                   | Boil                  |
| Brassica vegetables   | Cauliflower                   | Stir fry              |
| Brassica vegetables   | Preserved / pickled vegetable | Boil                  |
| Composite foods       | Carrot cake                   | Pan fry               |
| Composite foods       | Dhal                          | Boil                  |
| Composite foods       | Orh luak                      | Pan fry               |
| Composite foods       | Putu mayam                    | Steam                 |
| Composite foods       | You tiao                      | Deep fry              |
| Eggs and egg products | Century egg                   | Boil                  |
| Eggs and egg products | Century egg                   | No preparation        |
| Eggs and egg products | Egg                           | Boil                  |
| Eggs and egg products | Egg                           | Braise                |
| Eggs and egg products | Egg                           | Half boil             |
| Eggs and egg products | Egg                           | Pan fry               |
| Eggs and egg products | Egg                           | Steam                 |
| Eggs and egg products | Egg tofu                      | Boil                  |
| Eggs and egg products | Egg tofu                      | Pan fry               |

| <b>Food category</b>  | <b>Food</b>                              | <b>Cooking method</b> |
|-----------------------|------------------------------------------|-----------------------|
| Eggs and egg products | Salted duck egg                          | Boil                  |
| Fats and oils         | Animal fat                               | Deep fry              |
| Fats and oils         | Vegetable oil                            | Deep fry              |
| Fats and oils         | Vegetable oil                            | Stir fry              |
| Fish and seafood      | Anchovy                                  | Deep fry              |
| Fish and seafood      | Anchovy                                  | Pan fry               |
| Fish and seafood      | Anchovy                                  | Soup                  |
| Fish and seafood      | Canned sardine                           | Stew                  |
| Fish and seafood      | Canned sardine                           | Stir fry              |
| Fish and seafood      | Catfish                                  | Deep fry              |
| Fish and seafood      | Clam                                     | Boil                  |
| Fish and seafood      | Clam                                     | Stir fry              |
| Fish and seafood      | Cockle                                   | Boil                  |
| Fish and seafood      | Cockle                                   | No preparation        |
| Fish and seafood      | Cockle                                   | Stir fry              |
| Fish and seafood      | Crab                                     | Boil                  |
| Fish and seafood      | Crab                                     | Stir fry              |
| Fish and seafood      | Fish ball, fish cake and related product | Boil                  |
| Fish and seafood      | Fish head                                | Soup                  |
| Fish and seafood      | Fish nugget and related product          | Bake                  |
| Fish and seafood      | Fish nugget and related product          | Deep fry              |
| Fish and seafood      | Fish roe                                 | No preparation        |
| Fish and seafood      | Grouper                                  | Steam                 |
| Fish and seafood      | Kuning and related fishes                | Deep fry              |
| Fish and seafood      | Lobster / crayfish                       | Boil                  |
| Fish and seafood      | Lobster / crayfish                       | Stir fry              |
| Fish and seafood      | Mackerel and related fishes              | Pan fry               |
| Fish and seafood      | Mussel                                   | Steam                 |
| Fish and seafood      | Mussel                                   | Stir fry              |
| Fish and seafood      | Oyster                                   | Boil                  |
| Fish and seafood      | Oyster                                   | No preparation        |
| Fish and seafood      | Oyster                                   | Stir fry              |
| Fish and seafood      | Prawn / shrimp                           | Boil                  |
| Fish and seafood      | Prawn / shrimp                           | Deep fry              |
| Fish and seafood      | Prawn / shrimp                           | Soup                  |
| Fish and seafood      | Prawn / shrimp                           | Stir fry              |
| Fish and seafood      | Salmon                                   | Pan fry               |
| Fish and seafood      | Salted fish and related product          | Deep fry              |
| Fish and seafood      | Salted fish and related product          | Stir fry              |
| Fish and seafood      | Scallop                                  | Boil                  |
| Fish and seafood      | Scallop                                  | No preparation        |
| Fish and seafood      | Scallop                                  | Soup                  |
| Fish and seafood      | Scallop                                  | Stir fry              |

| <b>Food category</b>            | <b>Food</b>                    | <b>Cooking method</b> |
|---------------------------------|--------------------------------|-----------------------|
| Fish and seafood                | Sea cucumber                   | Boil                  |
| Fish and seafood                | Seabass                        | Steam                 |
| Fish and seafood                | Snapper                        | Steam                 |
| Fish and seafood                | Squid / cuttlefish             | Boil                  |
| Fish and seafood                | Squid / cuttlefish             | Stir fry              |
| Fish and seafood                | Squid ball and related product | Boil                  |
| Fish and seafood                | Threadfin                      | Steam                 |
| Fish and seafood                | Trout / Cod                    | Boil                  |
| Fish and seafood                | Trout / Cod                    | Deep fry              |
| Fish and seafood                | Trout / Cod                    | Steam                 |
| Fish and seafood                | Trout / Cod                    | Stew                  |
| Fish and seafood                | Tuna                           | Braise                |
| Fish and seafood                | Tuna                           | Pan fry               |
| Fruiting vegetables             | Bitter gourd                   | Boil                  |
| Fruiting vegetables             | Bitter gourd                   | Stir fry              |
| Fruiting vegetables             | Bottle gourd                   | Stir fry              |
| Fruiting vegetables             | Brinjal                        | Boil                  |
| Fruiting vegetables             | Brinjal                        | Steam                 |
| Fruiting vegetables             | Brinjal                        | Stir fry              |
| Fruiting vegetables             | Capsicum                       | Boil                  |
| Fruiting vegetables             | Capsicum                       | Stir fry              |
| Fruiting vegetables             | Chilli                         | Boil                  |
| Fruiting vegetables             | Chilli                         | No preparation        |
| Fruiting vegetables             | Chilli                         | Stir fry              |
| Fruiting vegetables             | Cucumber                       | No preparation        |
| Fruiting vegetables             | Ladies finger                  | Boil                  |
| Fruiting vegetables             | Ladies finger                  | Stir fry              |
| Fruiting vegetables             | Tomato                         | Boil                  |
| Fruiting vegetables             | Tomato                         | No preparation        |
| Fruiting vegetables             | Tomato                         | Stir fry              |
| Fruiting vegetables             | Winter melon                   | Boil                  |
| Fruiting vegetables             | Zucchini                       | Stir fry              |
| Fungi, seaweed                  | Black jelly fungus             | Boil                  |
| Fungi, seaweed                  | Canned mushroom                | Boil                  |
| Fungi, seaweed                  | Dried mushroom                 | Boil                  |
| Fungi, seaweed                  | Fresh mushroom                 | Boil                  |
| Fungi, seaweed                  | Fresh mushroom                 | Stir fry              |
| Fungi, seaweed                  | Seaweed                        | Boil                  |
| Fungi, seaweed                  | Seaweed                        | Soup                  |
| Fungi, seaweed                  | White jelly fungus             | Boil                  |
| Grains and grain-based products | Barley                         | Soup                  |
| Grains and grain-based products | Brown rice                     | Steam                 |
| Grains and grain-based products | Brown rice                     | Stir fry              |



| <b>Food category</b>            | <b>Food</b>           | <b>Cooking method</b> |
|---------------------------------|-----------------------|-----------------------|
| Grains and grain-based products | Buckwheat noodle      | Boil                  |
| Grains and grain-based products | Coconut rice          | Steam                 |
| Grains and grain-based products | Corn                  | Boil                  |
| Grains and grain-based products | Glutinous rice        | Steam                 |
| Grains and grain-based products | Instant noodle        | Boil                  |
| Grains and grain-based products | Noodles, wheat        | Boil                  |
| Grains and grain-based products | Oat                   | Boil                  |
| Grains and grain-based products | Pasta                 | Boil                  |
| Grains and grain-based products | Rice noodle           | Boil                  |
| Grains and grain-based products | Rice noodle           | Stir fry              |
| Grains and grain-based products | Udon                  | Boil                  |
| Grains and grain-based products | Vermicelli            | Boil                  |
| Grains and grain-based products | White basmati rice    | Boil                  |
| Grains and grain-based products | White basmati rice    | Steam                 |
| Grains and grain-based products | White japonica rice   | Steam                 |
| Grains and grain-based products | White jasmine rice    | Steam                 |
| Grains and grain-based products | White jasmine rice    | Stir fry              |
| Grains and grain-based products | Yellow and egg noodle | Boil                  |
| Leafy vegetables, herbs         | Bai cai               | Boil                  |
| Leafy vegetables, herbs         | Bai cai               | Stir fry              |
| Leafy vegetables, herbs         | Basil                 | Stir fry              |
| Leafy vegetables, herbs         | Bayam                 | Boil                  |
| Leafy vegetables, herbs         | Bayam                 | Stir fry              |
| Leafy vegetables, herbs         | Chinese celery        | Boil                  |
| Leafy vegetables, herbs         | Chinese celery        | Stir fry              |
| Leafy vegetables, herbs         | Chye sim              | Boil                  |
| Leafy vegetables, herbs         | Chye sim              | Stir fry              |
| Leafy vegetables, herbs         | Coriander             | Boil                  |
| Leafy vegetables, herbs         | Coriander             | No preparation        |
| Leafy vegetables, herbs         | Coriander             | Stir fry              |
| Leafy vegetables, herbs         | Kailan                | Boil                  |
| Leafy vegetables, herbs         | Kailan                | Stir fry              |
| Leafy vegetables, herbs         | Kale                  | Boil                  |
| Leafy vegetables, herbs         | Kale                  | Stir fry              |
| Leafy vegetables, herbs         | Kang kong             | Boil                  |
| Leafy vegetables, herbs         | Kang kong             | Stir fry              |
| Leafy vegetables, herbs         | Lettuce               | Boil                  |
| Leafy vegetables, herbs         | Lettuce               | No preparation        |
| Leafy vegetables, herbs         | Lettuce               | Stir fry              |
| Leafy vegetables, herbs         | Malabar               | Boil                  |
| Leafy vegetables, herbs         | Malabar               | Stir fry              |
| Leafy vegetables, herbs         | Mint leaf             | No preparation        |
| Leafy vegetables, herbs         | Nai bai               | Boil                  |

| <b>Food category</b>    | <b>Food</b>                                 | <b>Cooking method</b> |
|-------------------------|---------------------------------------------|-----------------------|
| Leafy vegetables, herbs | Nai bai                                     | Stir fry              |
| Leafy vegetables, herbs | Pandan leaf                                 | Soup                  |
| Leafy vegetables, herbs | Spinach                                     | Boil                  |
| Leafy vegetables, herbs | Spinach                                     | Stir fry              |
| Leafy vegetables, herbs | Sweet potato leaf                           | Boil                  |
| Leafy vegetables, herbs | Sweet potato leaf                           | Stir fry              |
| Leafy vegetables, herbs | Watercress                                  | Boil                  |
| Leafy vegetables, herbs | Xiao bai cai                                | Boil                  |
| Leafy vegetables, herbs | Xiao bai cai                                | Stir fry              |
| Legumes                 | Beansprout                                  | Boil                  |
| Legumes                 | Beansprout                                  | Stir fry              |
| Legumes                 | Dried bean                                  | Boil                  |
| Legumes                 | Fermented soybean product                   | Stir fry              |
| Legumes                 | Lentil                                      | Boil                  |
| Legumes                 | Lentil                                      | Stir fry              |
| Legumes                 | Long bean                                   | Stir fry              |
| Legumes                 | Pea                                         | Boil                  |
| Legumes                 | Pea                                         | Stir fry              |
| Legumes                 | Pea sprout                                  | Boil                  |
| Legumes                 | Pea sprout                                  | Stir fry              |
| Legumes                 | Soy beancurd, tofu, tau kwa, taupok, tempeh | Boil                  |
| Legumes                 | Soy beancurd, tofu, tau kwa, taupok, tempeh | Pan fry               |
| Legumes                 | Soybean                                     | Soup                  |
| Meat and meat products  | Beef bacon                                  | Pan fry               |
| Meat and meat products  | Beef, no fat                                | Boil                  |
| Meat and meat products  | Beef, no fat                                | Grill                 |
| Meat and meat products  | Beef, no fat                                | Pan fry               |
| Meat and meat products  | Beef, no fat                                | Stew                  |
| Meat and meat products  | Beef, no fat                                | Stir fry              |
| Meat and meat products  | Beef, with fat                              | Boil                  |
| Meat and meat products  | Beef, with fat                              | Grill                 |
| Meat and meat products  | Beef, with fat                              | Pan fry               |
| Meat and meat products  | Beef, with fat                              | Stew                  |
| Meat and meat products  | Beef, with fat                              | Stir fry              |
| Meat and meat products  | Chicken                                     | Boil                  |
| Meat and meat products  | Chicken                                     | Deep fry              |
| Meat and meat products  | Chicken                                     | Roast                 |
| Meat and meat products  | Chicken                                     | Soup                  |
| Meat and meat products  | Chicken                                     | Steam                 |
| Meat and meat products  | Chicken                                     | Stir fry              |
| Meat and meat products  | Chicken ham, bologna                        | No preparation        |
| Meat and meat products  | Chicken nugget                              | Bake                  |

| <b>Food category</b>              | <b>Food</b>                        | <b>Cooking method</b> |
|-----------------------------------|------------------------------------|-----------------------|
| Meat and meat products            | Chicken nugget                     | Deep fry              |
| Meat and meat products            | Chicken sausage, hot dog, cocktail | Boil                  |
| Meat and meat products            | Chicken sausage, hot dog, cocktail | Pan fry               |
| Meat and meat products            | Chinese sausage                    | Stir fry              |
| Meat and meat products            | Duck                               | Boil                  |
| Meat and meat products            | Duck                               | Braise                |
| Meat and meat products            | Duck                               | Roast                 |
| Meat and meat products            | Mutton, no fat                     | Boil                  |
| Meat and meat products            | Mutton, no fat                     | Stew                  |
| Meat and meat products            | Mutton, no fat                     | Stir fry              |
| Meat and meat products            | Pork bacon                         | Pan fry               |
| Meat and meat products            | Pork ham, bologna                  | No preparation        |
| Meat and meat products            | Pork luncheon meat                 | Deep fry              |
| Meat and meat products            | Pork luncheon meat                 | No preparation        |
| Meat and meat products            | Pork luncheon meat                 | Pan fry               |
| Meat and meat products            | Pork meat ball                     | Boil                  |
| Meat and meat products            | Pork organ                         | Boil                  |
| Meat and meat products            | Pork, no fat                       | Boil                  |
| Meat and meat products            | Pork, no fat                       | Roast                 |
| Meat and meat products            | Pork, no fat                       | Stir fry              |
| Meat and meat products            | Pork, with fat                     | Boil                  |
| Meat and meat products            | Pork, with fat                     | Roast                 |
| Meat and meat products            | Pork, with fat                     | Stir fry              |
| Meat and meat products            | Prawn meat ball                    | Boil                  |
| Nuts and seeds (including spices) | Peanut                             | Deep fry              |
| Root and tubers                   | Carrot                             | Boil                  |
| Root and tubers                   | Carrot                             | No preparation        |
| Root and tubers                   | Carrot                             | Stir fry              |
| Root and tubers                   | French fries                       | Deep fry              |
| Root and tubers                   | Lotus root                         | Soup                  |
| Root and tubers                   | Lotus root                         | Stir fry              |
| Root and tubers                   | Potato                             | Bake                  |
| Root and tubers                   | Potato                             | Boil                  |
| Root and tubers                   | Potato                             | Deep fry              |
| Root and tubers                   | Potato                             | Roast                 |
| Root and tubers                   | Potato                             | Stir fry              |
| Root and tubers                   | Pumpkin                            | Boil                  |
| Root and tubers                   | Sweet potato                       | Bake                  |
| Root and tubers                   | Sweet potato                       | Boil                  |
| Root and tubers                   | Sweet potato                       | Roast                 |
| Root and tubers                   | Sweet potato                       | Steam                 |
| Root and tubers                   | Yam                                | Boil                  |
| Root and tubers                   | Yam                                | Steam                 |

| Food category                   | Food                     | Cooking method |
|---------------------------------|--------------------------|----------------|
| Sauces and condiments           | Sambal chilli / belacan  | Stir fry       |
| Sauces and condiments           | Soy sauce, light         | Boil           |
| Sauces and condiments           | Soy sauce, light         | No preparation |
| Stalk, stem and bulb vegetables | Asparagus                | Boil           |
| Stalk, stem and bulb vegetables | Bamboo shoot             | Boil           |
| Stalk, stem and bulb vegetables | Celery                   | Boil           |
| Stalk, stem and bulb vegetables | Celery                   | Stir fry       |
| Stalk, stem and bulb vegetables | Dried lily bulb          | Boil           |
| Stalk, stem and bulb vegetables | Garlic                   | Soup           |
| Stalk, stem and bulb vegetables | Garlic                   | Stew           |
| Stalk, stem and bulb vegetables | Garlic                   | Stir fry       |
| Stalk, stem and bulb vegetables | Ginger                   | Soup           |
| Stalk, stem and bulb vegetables | Ginger                   | Steam          |
| Stalk, stem and bulb vegetables | Ginger                   | Stir fry       |
| Stalk, stem and bulb vegetables | Lily bulb                | Stir fry       |
| Stalk, stem and bulb vegetables | Lily bulb                | Stir fry       |
| Stalk, stem and bulb vegetables | Onion                    | Boil           |
| Stalk, stem and bulb vegetables | Onion                    | Stir fry       |
| Stalk, stem and bulb vegetables | Spring onion             | No preparation |
| Stalk, stem and bulb vegetables | Turmeric                 | Boil           |
| Vegetable protein               | Mock meat (gluten based) | Braise         |
| Vegetable protein               | Mock meat (gluten based) | Stir fry       |
| Vegetable protein               | Mock meat (soy based)    | Braise         |
| Vegetable protein               | Mock meat (soy based)    | Deep fry       |
| Vegetable protein               | Mock meat (soy based)    | Stir fry       |

**Table S7.** Foods contributing to 90% of the total amount of food and beverages consumed by weight

| Food category | Food                                                          | Food category           | Food                    |
|---------------|---------------------------------------------------------------|-------------------------|-------------------------|
| Beverages     | Alcohol, beer                                                 | Milk and dairy products | Butter, regular         |
|               | Alcohol, red wine                                             |                         | Cheese, low fat         |
|               | Carbonated soft drink                                         |                         | Cheese, regular         |
|               | Instant coffee                                                |                         | Fermented milk          |
|               | Non-carbonated sweetened beverage                             |                         | Ice cream               |
|               | Isotonic sport drinks                                         |                         | Milk, condensed         |
|               | Juice drink (manufactured, excluding freshly prepared juices) |                         | Milk, powdered, low fat |
|               | Sugarcane juice                                               |                         | Milk, powdered, regular |
|               | Malted, cereal or chocolate drink                             |                         | Milk, powdered, skimmed |
|               | Cocoa powder                                                  |                         | Milk, low fat           |
|               | Freshly brewed coffee                                         |                         | Milk, regular           |

| Food category                   | Food                                      | Food category           | Food                                        |
|---------------------------------|-------------------------------------------|-------------------------|---------------------------------------------|
|                                 | Green tea and chinese tea                 |                         | Milk, skimmed                               |
|                                 | Red (english) tea                         |                         | Yoghurt, low fat                            |
|                                 | Bottled water                             |                         | Yoghurt, regular                            |
|                                 | Milk tea                                  |                         | Creamer                                     |
| Bakery products                 | Biscuit                                   | Brassica vegetables     | Broccoli                                    |
|                                 | Cake                                      |                         | Cabbage                                     |
|                                 | Kueh, no coconut                          |                         | Cauliflower                                 |
|                                 | Kueh, with coconut                        | Fruiting vegetables     | Bitter gourd                                |
|                                 | Pancake                                   |                         | Bottle gourd                                |
|                                 | Pastry                                    |                         | Brinjal                                     |
|                                 | Puff and pie                              |                         | Capsicum                                    |
|                                 | Savoury bun (bao)                         |                         | Cucumber                                    |
|                                 | Sweet bun (bao)                           |                         | Ladies finger                               |
|                                 | White bread                               |                         | Tomato                                      |
|                                 | Wholemeal bread                           |                         | Winter melon                                |
| Fish and seafood                | Crab                                      |                         | Zucchini                                    |
|                                 | Threadfin (ngor he)                       | Leafy vegetables, herbs | Bai cai                                     |
|                                 | Snapper                                   |                         | Bayam                                       |
|                                 | Seabass                                   |                         | Chinese celery                              |
|                                 | Grouper                                   |                         | Chye sim                                    |
|                                 | Catfish                                   |                         | Kailan                                      |
|                                 | Squid / cuttlefish                        |                         | Kale                                        |
|                                 | Salmon                                    |                         | Kang kong                                   |
|                                 | Prawn / shrimp                            |                         | Lettuce                                     |
|                                 | Canned tuna                               |                         | Malabar                                     |
|                                 | Fish ball, fish cake and related product  |                         | Nai bai                                     |
|                                 | Mackerel and related fishes (e.g. batang) |                         | Spinach                                     |
|                                 | Fish head                                 |                         | Sweet potato leaf                           |
| Grains and grain-based products | Barley                                    |                         | Watercress                                  |
|                                 | Breakfast cereal                          |                         | Xiao bai cai                                |
|                                 | Coconut rice                              | Legumes                 | Beancurd dessert                            |
|                                 | Corn                                      |                         | Beansprout                                  |
|                                 | Glutinous rice                            |                         | Lentil                                      |
|                                 | Rice noodle                               |                         | Long bean                                   |
|                                 | Noodles, wheat (e.g. ban mian)            |                         | Pea                                         |
|                                 | Instant noodle                            |                         | Soybean                                     |
|                                 | Yellow and egg noodle                     |                         | Soy beancurd, tofu, tau kwa, taupok, tempeh |
|                                 | Vermicelli                                |                         | Soy milk                                    |
|                                 | Udon                                      | Root and tubers         | Carrot                                      |
|                                 | Oat                                       |                         | French fries                                |
|                                 | Pasta                                     |                         | Potato                                      |

| Food category             | Food                               | Food category                   | Food                                      |
|---------------------------|------------------------------------|---------------------------------|-------------------------------------------|
|                           | Roti prata                         |                                 | Pumpkin                                   |
|                           | Thosai                             |                                 | Sweet potato                              |
|                           | White jasmine rice                 | Stalk, stem and bulb vegetables | Celery                                    |
|                           | White basmati rice                 |                                 | Garlic                                    |
|                           | White japonica rice                |                                 | Ginger                                    |
|                           | Brown rice                         |                                 | Onion                                     |
| Meat and meat products    | Beef, no fat                       |                                 | Spring onion                              |
|                           | Beef, with fat                     | Fruit and fruit products        | Apple                                     |
|                           | Chicken                            |                                 | Avocado                                   |
|                           | Chicken ham, bologna               |                                 | Banana                                    |
|                           | Chicken nugget                     |                                 | Blueberry                                 |
|                           | Chicken sausage, hot dog, cocktail |                                 | Coconut milk                              |
|                           | Duck                               |                                 | Coconut water                             |
|                           | Pork ham, bologna                  |                                 | Grape                                     |
|                           | Pork meat ball                     |                                 | Guava                                     |
|                           | Pork, no fat                       |                                 | Kaya                                      |
|                           | Pork, with fat                     |                                 | Kiwi                                      |
|                           | Pork luncheon meat                 |                                 | Lime / calamansi                          |
| Eggs and egg products     | Egg                                |                                 | Mango                                     |
|                           | Egg tofu                           |                                 | Melon                                     |
| Fungi, seaweed            | Fresh mushroom                     |                                 | Orange                                    |
|                           | Dried mushroom                     |                                 | Papaya                                    |
|                           | Canned mushroom                    |                                 | Pear                                      |
| Nuts and seeds            | Peanut butter                      |                                 | Pineapple                                 |
|                           | Sambal chilli / belacan            |                                 | Watermelon                                |
| Sauces and condiments     | Soy sauce, light                   | Composite foods                 | Dhal                                      |
|                           | Sugar, white                       |                                 | Idli                                      |
|                           | Tomato sauce                       |                                 | Mushroom soup (canned, instant, prepared) |
|                           | Vegetable oil                      |                                 | You tiao                                  |
| Fats and oils             | Olive oil                          |                                 | Meat dumpling                             |
| Tap water, drinking water | Water                              |                                 | Curry gravy (meat)                        |
|                           |                                    |                                 | Curry gravy (fish)                        |
|                           |                                    |                                 | Fried carrot cake                         |
|                           |                                    |                                 | Boba (tapioca pearl)                      |

**Table S8.** Foods consumed by more than 10% of all consumers

| Food category | Food                  | Food category | Food       |
|---------------|-----------------------|---------------|------------|
| Beverages     | Alcohol, white wine   | Vegetables    | Basil      |
|               | Carbonated soft drink |               | Beansprout |
|               | Freshly brewed coffee |               | Broccoli   |
|               | Instant coffee        |               | Cabbage    |

| Food category                   | Food                                     |
|---------------------------------|------------------------------------------|
|                                 | Malted, cereal or chocolate drink        |
|                                 | Red (english) tea                        |
| Bakery products                 | Biscuit                                  |
|                                 | Sweet bun (bao)                          |
|                                 | White bread                              |
|                                 | Wholemeal bread                          |
| Fish and seafood                | Fish ball, fish cake and related product |
|                                 | Prawn / shrimp                           |
|                                 | Snapper                                  |
| Grains and grain-based products | Brown rice                               |
|                                 | Instant noodle                           |
|                                 | Rice noodle                              |
|                                 | White jasmine rice                       |
|                                 | Yellow and egg noodle                    |
| Meat and meat products          | Beef                                     |
|                                 | Chicken                                  |
|                                 | Chinese sausage (eg. lup cheong)         |
|                                 | Pork                                     |
| Eggs and egg products           | Egg                                      |
| Fats and oils                   | Vegetable oil                            |
| Milk and dairy products         | Cheese, regular                          |
|                                 | Butter, regular                          |
|                                 | Milk, condensed                          |
|                                 | Milk, regular                            |
| Fruit and fruit products        | Apple                                    |
|                                 | Coconut milk                             |
|                                 | Lime / calamansi                         |
|                                 | Orange                                   |
| Tap water, drinking water       | Tap water                                |
| Fungi, seaweed                  | Dried mushroom                           |
|                                 | Fresh mushroom                           |
| RTE savouries                   | Roasted nut snack                        |

| Food category         | Food                                        |
|-----------------------|---------------------------------------------|
|                       | Capsicum                                    |
|                       | Carrot                                      |
|                       | Chilli                                      |
|                       | Chye sim                                    |
|                       | Coriander                                   |
|                       | Cucumber                                    |
|                       | Fermented soybean product                   |
|                       | Garlic                                      |
|                       | Ginger                                      |
|                       | Lettuce                                     |
|                       | Onion                                       |
|                       | Pandan leaf                                 |
|                       | Pea                                         |
|                       | Potato                                      |
|                       | Soy beancurd, tofu, tau kwa, taupok, tempeh |
|                       | Spring onion                                |
|                       | Tomato                                      |
|                       | Xiao bai cai                                |
| Sauces and condiments | Chilli powder                               |
|                       | Chilli sauce                                |
|                       | Fish sauce                                  |
|                       | Oil, sesame                                 |
|                       | Oyster sauce                                |
|                       | Pepper, black                               |
|                       | Pepper, white, powder                       |
|                       | Salt                                        |
|                       | Sambal chilli / belacan                     |
|                       | Soy sauce, dark                             |
|                       | Soy sauce, light                            |
|                       | Sugar, white                                |
| Composite foods       | Tomato sauce                                |
|                       | Curry gravy (meat)                          |
|                       | Meat dumpling                               |

**Table S9.** Foods consumed by more than 10% of the four major races of the Singapore population

| Food category                     | Food                                     | Consumed by more than 10% |       |        |        |
|-----------------------------------|------------------------------------------|---------------------------|-------|--------|--------|
|                                   |                                          | Chinese                   | Malay | Indian | Others |
| Beverages                         | Carbonated soft drink                    | √                         | √     | √      | √      |
|                                   | Freshly brewed coffee                    | √                         | √     | √      | √      |
|                                   | Instant coffee                           | √                         | √     | √      | √      |
|                                   | Malted, cereal or chocolate drink        | √                         | √     | √      |        |
|                                   | Milk tea                                 |                           | √     |        | √      |
|                                   | Red (english) tea                        | √                         | √     | √      | √      |
| Bakery products                   | Biscuit                                  |                           | √     | √      | √      |
|                                   | White bread                              | √                         | √     | √      | √      |
|                                   | Wholemeal bread                          | √                         | √     | √      | √      |
| Fish and seafood                  | Fish ball, fish cake and related product | √                         | √     |        | √      |
|                                   | Prawn, pink                              | √                         |       |        |        |
|                                   | Salmon                                   | √                         |       |        |        |
| Grains and grain-based products   | Breakfast cereal                         |                           |       |        | √      |
|                                   | Brown rice                               | √                         |       | √      |        |
|                                   | Chapati                                  |                           |       | √      |        |
|                                   | Instant noodle                           |                           |       | √      |        |
|                                   | Oat                                      | √                         |       | √      |        |
|                                   | Pasta                                    |                           |       |        | √      |
|                                   | Rice noodle                              | √                         | √     |        | √      |
|                                   | Roti prata                               |                           | √     | √      | √      |
|                                   | Thosai                                   |                           |       | √      |        |
|                                   | White basmati rice                       |                           | √     | √      | √      |
|                                   | White japonica rice                      |                           |       |        | √      |
|                                   | White jasmine rice                       | √                         | √     | √      | √      |
|                                   | Yellow and egg noodle                    | √                         | √     | √      | √      |
| Meat and meat products            | Beef                                     |                           | √     |        | √      |
|                                   | Chicken                                  | √                         | √     | √      | √      |
|                                   | Chinese sausage (eg. lup cheong)         | √                         | √     |        | √      |
|                                   | Mutton                                   |                           | √     | √      |        |
|                                   | Pork, no fat                             | √                         |       |        | √      |
|                                   | Pork, with fat                           | √                         |       |        | √      |
| Eggs and egg products             | Egg                                      | √                         | √     | √      | √      |
| Fats and oils                     | Olive oil                                |                           |       |        | √      |
|                                   | Vegetable oil                            | √                         | √     | √      | √      |
| Nuts and seeds (including spices) | Peanut                                   |                           | √     |        | √      |
|                                   | Peanut butter                            |                           | √     |        | √      |
| Milk and dairy products           | Butter                                   | √                         | √     | √      | √      |
|                                   | Cheese                                   | √                         | √     |        | √      |
|                                   | Milk, condensed                          | √                         | √     | √      | √      |



| Food category             | Food                                        | Consumed by more than 10% |       |        |        |
|---------------------------|---------------------------------------------|---------------------------|-------|--------|--------|
|                           |                                             | Chinese                   | Malay | Indian | Others |
|                           | Milk, powdered                              |                           |       | √      |        |
|                           | Milk, regular                               |                           | √     | √      | √      |
|                           | Milk, skimmed                               |                           |       |        | √      |
|                           | Yogurt                                      |                           |       | √      |        |
| Fruit and fruit products  | Apple                                       | √                         |       | √      | √      |
|                           | Banana                                      |                           | √     | √      |        |
|                           | Coconut flesh                               |                           |       | √      |        |
|                           | Coconut milk                                |                           | √     | √      | √      |
|                           | Kaya                                        | √                         |       |        | √      |
|                           | Lime / calamansi                            | √                         | √     | √      | √      |
|                           | Pineapple                                   |                           |       |        | √      |
| Tap water, drinking water | Tap water                                   | √                         | √     | √      | √      |
| Vegetables                | Beansprout                                  | √                         | √     | √      | √      |
|                           | Bitter gourd                                | √                         |       |        |        |
|                           | Brinjal                                     |                           |       | √      | √      |
|                           | Broccoli                                    | √                         |       | √      | √      |
|                           | Cabbage                                     | √                         | √     | √      | √      |
|                           | Carrot                                      | √                         | √     | √      | √      |
|                           | Cauliflower                                 |                           |       | √      |        |
|                           | Chilli                                      | √                         | √     | √      | √      |
|                           | Chye sim                                    | √                         |       |        | √      |
|                           | Coriander                                   | √                         | √     | √      | √      |
|                           | Cucumber                                    | √                         | √     | √      | √      |
|                           | Garlic                                      | √                         | √     | √      | √      |
|                           | Ginger                                      | √                         | √     | √      | √      |
|                           | Kang kong                                   |                           |       |        | √      |
|                           | Ladies finger                               |                           |       | √      |        |
|                           | Lentil                                      |                           |       | √      |        |
|                           | Lettuce                                     | √                         | √     |        | √      |
|                           | Long bean                                   |                           |       | √      | √      |
|                           | Mint leaf                                   |                           |       |        | √      |
|                           | Onion                                       | √                         | √     | √      | √      |
|                           | Pandan leaf                                 | √                         | √     | √      | √      |
|                           | Pea                                         |                           |       | √      |        |
|                           | Potato                                      | √                         | √     | √      | √      |
|                           | Soy beancurd, tofu, tau kwa, taupok, tempeh | √                         | √     |        | √      |
|                           | Spinach                                     | √                         |       | √      |        |
|                           | Spring onion                                | √                         | √     | √      | √      |
|                           | Tomato                                      | √                         | √     | √      | √      |
|                           | Turmeric                                    |                           | √     | √      | √      |
|                           | Xiao bai cai                                | √                         |       |        |        |

| Food category         | Food                  | Consumed by more than 10% |       |        |        |
|-----------------------|-----------------------|---------------------------|-------|--------|--------|
|                       |                       | Chinese                   | Malay | Indian | Others |
| Sauces and condiments | Chilli powder         |                           | √     | √      | √      |
|                       | Chilli sauce          | √                         | √     | √      | √      |
|                       | Fish sauce            | √                         | √     | √      | √      |
|                       | Mayonnaise            |                           | √     |        | √      |
|                       | Oil, sesame           | √                         | √     | √      | √      |
|                       | Oyster sauce          | √                         |       |        | √      |
|                       | Pepper, black         |                           |       |        | √      |
|                       | Pepper, white, powder | √                         | √     |        | √      |
|                       | Salt                  | √                         | √     | √      | √      |
|                       | Sambal chilli/belacan |                           | √     | √      |        |
|                       | Soy sauce, dark       | √                         | √     | √      | √      |
|                       | Soy sauce, light      | √                         | √     | √      | √      |
|                       | Sugar, white          | √                         | √     | √      | √      |
|                       | Tomato sauce          |                           |       | √      | √      |
|                       | Vinegar               |                           |       |        | √      |
| Composite foods       | Curry gravy (meat)    |                           | √     | √      | √      |
|                       | Curry gravy (fish)    |                           | √     | √      |        |
|                       | Dhal                  |                           |       | √      | √      |
|                       | Idli                  |                           |       | √      |        |

**Table S10.** Foods consumed in small amounts but may have high contribution to dietary exposure

| Food category                   | Food                          |
|---------------------------------|-------------------------------|
| Brassica vegetables             | Preserved / pickled vegetable |
|                                 | Dried lily bulb               |
| Stalk, stem and bulb vegetables | Lily bulb                     |
|                                 | Asparagus                     |
|                                 | Bamboo shoot                  |
| Legumes                         | Dried bean                    |
|                                 | Pea sprout                    |
| Root and tubers                 | Yam                           |
|                                 | Lotus root                    |
| Fungi, seaweed                  | Dried seaweed                 |
|                                 | Seaweed                       |
|                                 | Black jelly fungus            |
|                                 | White jelly fungus            |
| Nuts and seeds                  | Sesame seed                   |
| Fruit and fruit products        | Dried raisins                 |
|                                 | Dried apricot                 |
|                                 | Dried dates                   |
|                                 | Dried mango                   |
|                                 | Dried prunes                  |

| Food category           | Food                    |
|-------------------------|-------------------------|
|                         | Aloe vera               |
|                         | Dragonfruit             |
|                         | Durian                  |
|                         | Jackfruit               |
|                         | Longan                  |
|                         | Mandarin orange         |
|                         | Mangosteen              |
|                         | Peach                   |
|                         | Persimmon               |
|                         | Plum                    |
|                         | Pomelo                  |
|                         | Rambutan                |
|                         | Soursop                 |
|                         | Starfruit               |
|                         | Strawberry              |
|                         | Water chestnut          |
|                         | Jam                     |
| Sauces and condiments   | Chilli powder           |
|                         | MSG                     |
|                         | Satay sauce             |
|                         | Cream sauce             |
|                         | Cheese sauce            |
|                         | Mustard sauce           |
|                         | Thousand island sauce   |
|                         | Teriyaki sauce          |
| Fats and oils           | Wasabi                  |
|                         | Animal fat              |
| Eggs and egg products   | Salted duck egg         |
|                         | Century egg             |
| RTE savouries           | Fish based snack        |
|                         | Fried chips and cracker |
|                         | Popcorn                 |
|                         | Roasted nut snack       |
| Meat and meat products  | Pork organ              |
|                         | Pork bacon              |
|                         | Prawn meat ball         |
| Milk and dairy products | Beef bacon              |
|                         | Margarine               |
| Bakery products         | Bun, custard            |
| Confectionary           | Chocolate               |
|                         | Honey                   |
|                         | Candy / sweet           |
|                         | Dairy pudding           |

| Food category                   | Food                             |
|---------------------------------|----------------------------------|
| Fish and seafood                | Jelly                            |
|                                 | Syrup                            |
|                                 | Clam                             |
|                                 | Cockle                           |
|                                 | Lobster / crayfish               |
|                                 | Mussel                           |
|                                 | Oyster                           |
|                                 | Sea cucumber                     |
|                                 | Scallop                          |
|                                 | Anchovy                          |
|                                 | Salted fish and related product  |
|                                 | Trout / Cod                      |
|                                 | Tuna                             |
|                                 | Kuning and related fishes        |
|                                 | Canned sardine                   |
|                                 | Fish nugget and related product  |
|                                 | Fish roe                         |
|                                 | Squid ball and related product   |
| Grains and grain-based products | Rice dumpling                    |
|                                 | Buckwheat noodle                 |
| Beverages                       | Energy drinks (e.g. red bull)    |
| Vegetable protein               | Mock meat (gluten, soy-based)    |
| Composite foods                 | Pizza                            |
|                                 | Fried oyster omelette (orh luak) |
|                                 | Putu mayam                       |
|                                 | Kimchi                           |

**Table S11.** Foods and beverages included in Singapore's TDS food list

| Food Category   | Foods              | Food Category            | Foods                  |
|-----------------|--------------------|--------------------------|------------------------|
| Bakery products | Biscuit            | Fruit and fruit products | Aloe vera              |
|                 | Bun, custard       |                          | Apple <sup>o</sup>     |
|                 | Cake               |                          | Avocado <sup>o</sup>   |
|                 | Kueh, no coconut   |                          | Banana                 |
|                 | Kueh, with coconut |                          | Blueberry <sup>o</sup> |
|                 | Pancake            |                          | Coconut flesh          |
|                 | Pastry             |                          | Coconut milk           |
|                 | Puff and pie       |                          | Coconut water          |
|                 | Savoury bun (bao)  |                          | Dragonfruit            |
|                 | Sweet bun (bao)    |                          | Dried apricot          |
|                 | White bread        |                          | Dried dates            |
|                 | Wholemeal bread    |                          | Dried mango            |
|                 | Alcohol, Beer      |                          | Dried prunes           |

| Food Category                          | Foods                             |
|----------------------------------------|-----------------------------------|
| Beverages<br>(including bottled water) | Alcohol, Red Wine                 |
|                                        | Alcohol, White Wine               |
|                                        | Bottled water                     |
|                                        | Carbonated soft drink             |
|                                        | Cocoa powder                      |
|                                        | Energy drinks                     |
|                                        | Freshly brewed coffee             |
|                                        | Green tea and chinese tea         |
|                                        | Instant coffee                    |
|                                        | Isotonic sport drinks             |
|                                        | Juice drink                       |
|                                        | Malted, cereal or chocolate drink |
|                                        | Milk tea                          |
|                                        | Non-carbonated sweetened beverage |
|                                        | Red (english) tea                 |
|                                        | Sugarcane juice                   |
| Tap water, drinking water              | Tap water                         |
| Composite foods                        | Boba (tapioca pearl)              |
|                                        | Carrot cake (菜头粿)                 |
|                                        | Curry gravy (fish)                |
|                                        | Curry gravy (meat)                |
|                                        | Dhal                              |
|                                        | Idli                              |
|                                        | Kimchi                            |
|                                        | Meat dumpling                     |
|                                        | Mushroom soup                     |
|                                        | Orh luak                          |
|                                        | Pizza                             |
|                                        | Putu mayam                        |
|                                        | You tiao                          |
| Confectionary                          | Candy / sweet                     |
|                                        | Chocolate                         |
|                                        | Dairy pudding                     |
|                                        | Honey                             |
|                                        | Jelly                             |
| Eggs and egg products                  | Syrup                             |
|                                        | Century egg                       |
|                                        | Egg                               |
|                                        | Egg tofu                          |

| Food Category    | Foods                                    |
|------------------|------------------------------------------|
|                  | Dried raisins                            |
|                  | Durian <sup>o</sup>                      |
|                  | Grape <sup>o</sup>                       |
|                  | Guava                                    |
|                  | Jackfruit                                |
|                  | Jam                                      |
|                  | Kaya                                     |
|                  | Kiwi <sup>o</sup>                        |
|                  | Lime / calamansi                         |
|                  | Longan                                   |
|                  | Mandarin orange <sup>o</sup>             |
|                  | Mango <sup>o</sup>                       |
|                  | Mangosteen <sup>o</sup>                  |
|                  | Melon                                    |
|                  | Orange <sup>o</sup>                      |
|                  | Papaya                                   |
|                  | Peach <sup>o</sup>                       |
|                  | Pear <sup>o</sup>                        |
|                  | Persimmon <sup>o</sup>                   |
|                  | Pineapple                                |
|                  | Plum <sup>o</sup>                        |
|                  | Pomelo <sup>o</sup>                      |
|                  | Rambutan <sup>o</sup>                    |
|                  | Soursop                                  |
|                  | Starfruit <sup>o</sup>                   |
|                  | Strawberry <sup>o</sup>                  |
|                  | Water chestnut                           |
|                  | Watermelon                               |
| Fish and seafood | Anchovy <sup>o</sup>                     |
|                  | Canned sardine                           |
|                  | Canned tuna                              |
|                  | Catfish                                  |
|                  | Clam                                     |
|                  | Cockle <sup>o</sup>                      |
|                  | Crab                                     |
|                  | Fish ball, fish cake and related product |
|                  | Fish head, boiled                        |
|                  | Fish nugget and related product          |
|                  | Fish roe                                 |

| Food Category                   | Foods                           |
|---------------------------------|---------------------------------|
|                                 | Salted duck egg                 |
| Fats and oils                   | Animal fat                      |
|                                 | Olive oil                       |
|                                 | Vegetable oil                   |
| Grains and grain-based products | Barley <sup>o</sup>             |
|                                 | Breakfast cereal                |
|                                 | Brown rice                      |
|                                 | Buckwheat noodle                |
|                                 | Chapati                         |
|                                 | Coconut rice                    |
|                                 | Corn                            |
|                                 | Glutinous rice                  |
|                                 | Instant noodle                  |
|                                 | Noodles, wheat                  |
|                                 | Oat                             |
|                                 | Pasta                           |
|                                 | Rice dumpling <sup>o</sup>      |
|                                 | Rice noodle                     |
|                                 | Roti prata                      |
|                                 | Thosai                          |
|                                 | Udon                            |
|                                 | Vermicelli <sup>o</sup>         |
|                                 | White basmati rice              |
|                                 | White japonica rice             |
|                                 | White jasmine rice              |
|                                 | Yellow and egg noodle           |
| Fungi, seaweed                  | Black jelly fungus              |
|                                 | Canned mushroom                 |
|                                 | Dried mushroom                  |
|                                 | Dried seaweed                   |
|                                 | Fresh mushroom                  |
|                                 | Seaweed <sup>o</sup>            |
|                                 | White jelly fungus <sup>o</sup> |
| Brassica vegetables             | Broccoli <sup>o</sup>           |
|                                 | Cabbage                         |
|                                 | Cauliflower                     |
|                                 | Preserved / pickled vegetable   |
| Fruiting vegetables             | Bitter gourd                    |
|                                 | Bottle gourd                    |

| Food Category           | Foods                                        |
|-------------------------|----------------------------------------------|
|                         | Grouper                                      |
|                         | Kuning and related fishes                    |
|                         | Lobster / crayfish                           |
|                         | Mackerel and related fishes                  |
|                         | Mussel <sup>o</sup>                          |
|                         | Oyster <sup>o</sup>                          |
|                         | Prawn / shrimp                               |
|                         | Salmon                                       |
|                         | Salted fish and related product <sup>o</sup> |
|                         | Scallop <sup>o</sup>                         |
|                         | Sea cucumber <sup>o</sup>                    |
|                         | Seabass                                      |
|                         | Snapper                                      |
|                         | Squid / cuttlefish                           |
|                         | Squid ball and related product               |
|                         | Threadfin                                    |
| Meat and meat products  | Trout / Cod <sup>o</sup>                     |
|                         | Tuna <sup>o</sup>                            |
|                         | Beef bacon                                   |
|                         | Beef, no fat                                 |
|                         | Beef, with fat                               |
|                         | Chicken                                      |
|                         | Chicken ham, bologna                         |
|                         | Chicken nugget                               |
|                         | Chicken sausage, hot dog, cocktail           |
|                         | Chinese sausage                              |
|                         | Duck                                         |
|                         | Mutton, no fat                               |
|                         | Pork bacon                                   |
|                         | Pork ham, bologna                            |
|                         | Pork luncheon meat                           |
|                         | Pork meat ball                               |
| Milk and dairy products | Pork organ                                   |
|                         | Pork, no fat                                 |
|                         | Pork, with fat                               |
|                         | Prawn meat ball                              |
|                         | Butter, regular                              |
|                         | Cheese, low fat                              |
|                         | Cheese, regular                              |

| Food Category           | Foods                                       |
|-------------------------|---------------------------------------------|
|                         | Brinjal                                     |
|                         | Capsicum                                    |
|                         | Chilli                                      |
|                         | Cucumber                                    |
|                         | Ladies finger <sup>o</sup>                  |
|                         | Tomato                                      |
|                         | Winter melon                                |
|                         | Zucchini                                    |
| Leafy vegetables, herbs | Bai cai                                     |
|                         | Basil                                       |
|                         | Bayam                                       |
|                         | Chinese celery                              |
|                         | Chye sim                                    |
|                         | Coriander                                   |
|                         | Kailan                                      |
|                         | Kale                                        |
|                         | Kang kong                                   |
|                         | Lettuce                                     |
|                         | Malabar                                     |
|                         | Mint leaf                                   |
|                         | Nai bai                                     |
|                         | Pandan leaf                                 |
|                         | Spinach                                     |
|                         | Sweet potato leaf                           |
|                         | Watercress                                  |
|                         | Xiao bai cai                                |
| Legumes                 | Beancurd Dessert                            |
|                         | Beansprout                                  |
|                         | Dried bean                                  |
|                         | Fermented soybean product                   |
|                         | Lentil                                      |
|                         | Long bean                                   |
|                         | Pea                                         |
|                         | Pea sprout                                  |
|                         | Soy beancurd, tofu, tau kwa, taupok, tempeh |
|                         | Soy milk                                    |
|                         | Soybean                                     |
| Root and tubers         | Carrot                                      |
|                         | French fries                                |

| Food Category                     | Foods                   |
|-----------------------------------|-------------------------|
|                                   | Creamer                 |
|                                   | Fermented milk          |
|                                   | Ice cream               |
|                                   | Margarine               |
|                                   | Milk, condensed         |
|                                   | Milk, low fat           |
|                                   | Milk, powdered, low fat |
|                                   | Milk, powdered, regular |
|                                   | Milk, powdered, skimmed |
|                                   | Milk, regular           |
|                                   | Milk, skimmed           |
|                                   | Yoghurt, low fat        |
|                                   | Yoghurt, regular        |
| Nuts and seeds (including spices) | Peanut                  |
|                                   | Peanut butter           |
|                                   | Sesame seed             |
| RTE savouries                     | Fish based snack        |
|                                   | Fried chips and cracker |
|                                   | Popcorn                 |
|                                   | Roasted nut snack       |
| Sauces and condiments             | Cheese sauce            |
|                                   | Chilli powder           |
|                                   | Chilli sauce            |
|                                   | Cream sauce             |
|                                   | Fish sauce              |
|                                   | Mayonnaise              |
|                                   | MSG                     |
|                                   | Mustard sauce           |
|                                   | Oil, sesame             |
|                                   | Oyster sauce            |
|                                   | Pepper, black           |
|                                   | Pepper, white, powder   |
|                                   | Salt                    |
|                                   | Sambal chilli / belacan |
|                                   | Satay sauce             |
|                                   | Soy sauce, dark         |
|                                   | Soy sauce, light        |
|                                   | Sugar, white            |
|                                   | Teriyaki sauce          |

| Food Category                   | Foods                  |
|---------------------------------|------------------------|
|                                 | Lotus root             |
|                                 | Potato                 |
|                                 | Pumpkin                |
|                                 | Sweet potato           |
|                                 | Yam                    |
| Stalk, stem and bulb vegetables | Asparagus <sup>◊</sup> |
|                                 | Bamboo shoot           |
|                                 | Celery                 |
|                                 | Dried lily bulb        |
|                                 | Garlic <sup>◊</sup>    |
|                                 | Ginger                 |
|                                 | Lily bulb <sup>◊</sup> |
|                                 | Onion <sup>◊</sup>     |
|                                 | Spring onion           |
|                                 | Turmeric               |

<sup>◊</sup> Seasonal foods

| Food Category     | Foods                    |
|-------------------|--------------------------|
|                   | Thousand island sauce    |
|                   | Tomato sauce             |
|                   | Vinegar                  |
|                   | Wasabi                   |
| Vegetable protein | Mock meat (gluten based) |
|                   | Mock meat (soy based)    |





|                                 | Mean concentration [ppb] |             |                       |              |           |                               |                |                         |                   |
|---------------------------------|--------------------------|-------------|-----------------------|--------------|-----------|-------------------------------|----------------|-------------------------|-------------------|
| Food Category                   | Aflatoxin B & G (sum)    | Aflatoxin M | DON & its derivatives | Ochratoxin A | Fumonisin | Zearalenone & its derivatives | Ergot Alkaloid | Pyrrolizidine Alkaloids | Tropane Alkaloids |
| Fruiting vegetables             | -                        | -           | -                     | -            | -         | -                             | -              | -                       | -                 |
| Leafy vegetables, herbs         | -                        | -           | -                     | -            | -         | -                             | -              | -                       | -                 |
| Legumes                         | 1.16                     | -           | -                     | 1.21         | -         | -                             | -              | -                       | -                 |
| Root and tubers                 | -                        | -           | -                     | -            | -         | -                             | -              | -                       | -                 |
| Stalk, stem and bulb vegetables | -                        | -           | -                     | 12.62        | 8.81      | -                             | -              | -                       | -                 |
| Sauces and condiments           | 0.48                     | -           | 47.20                 | 0.51         | 65.40     | -                             | -              | -                       | -                 |
| Composite foods                 | -                        | -           | 11.30                 | 0.18         | -         | -                             | 1.87           | -                       | -                 |

**Table S13.** Mean concentrations of pesticide residues, in ppb, for each food category in Singapore's TDS

|                                     | Mean concentration [ppb] |                  |         |
|-------------------------------------|--------------------------|------------------|---------|
| Food Category                       | Multi-residues           | Dithiocarbamates | ETU/PTU |
| Beverages (including bottled water) | 7.5                      | -                | -       |
| Bakery products                     | 8.6                      | -                | -       |
| Fish and seafood                    | 13.7                     | -                | 20.0    |
| Grains and grain-based products     | 27.3                     | -                | -       |
| Meat and meat products              | 24.3                     | -                | -       |

|                                   | Mean concentration [ppb] |                  |         |
|-----------------------------------|--------------------------|------------------|---------|
| Food Category                     | Multi-residues           | Dithiocarbamates | ETU/PTU |
| Eggs and egg products             | -                        | -                | -       |
| Fats and oils                     | -                        | -                | -       |
| Milk and dairy products           | -                        | -                | -       |
| Fruit and fruit products          | 39.0                     | 90.7             | 19.0    |
| Tap water, drinking water         | -                        | -                | -       |
| Confectionary                     | -                        | -                | -       |
| RTE savouries                     | 35.9                     | -                | -       |
| Fungi, seaweed                    | 14.4                     | -                | -       |
| Nuts and seeds (including spices) | 5.6                      | 115.6            | -       |
| Vegetable protein                 | 5.4                      | -                | -       |
| Brassica vegetables               | 50.0                     | 1,029.4          | -       |
| Fruiting vegetables               | 55.2                     | 126.4            | 26.2    |
| Leafy vegetables, herbs           | 110.6                    | 1,004.0          | 99.0    |
| Legumes                           | 45.5                     | -                | 115.5   |
| Root and tubers                   | 63.2                     | -                | 21.3    |
| Stalk, stem and bulb vegetables   | 103.8                    | 1,957.7          | 18.6    |

|                       | Mean concentration [ppb] |                  |         |
|-----------------------|--------------------------|------------------|---------|
| Food Category         | Multi-residues           | Dithiocarbamates | ETU/PTU |
| Sauces and condiments | 23.9                     | -                | 50.4    |
| Composite foods       | 8.1                      | -                | 50.0    |

**Table S14.** Mean concentrations of persistent organic pollutants, for each food category in Singapore's TDS

| Food Category                   | Dioxins and dioxin-like PCBs<br>(sum of PCDDs, PCDFs, dioxin-like PCBs)<br>[pg TEQ/g fw] | Perfluorinated<br>compounds [ppb] |
|---------------------------------|------------------------------------------------------------------------------------------|-----------------------------------|
| Beverages                       | 0.01                                                                                     | -                                 |
| Bakery products                 | 0.02                                                                                     | -                                 |
| Fish and seafood                | 0.10                                                                                     | 2.1                               |
| Grains and grain-based products | 0.01                                                                                     | -                                 |
| Meat and meat products          | 0.03                                                                                     | -                                 |
| Eggs and egg products           | 0.02                                                                                     | -                                 |
| Fats and oils                   | 0.05                                                                                     | -                                 |
| Milk and dairy products         | 0.02                                                                                     | -                                 |
| Fruit and fruit products        | 0.01                                                                                     | -                                 |
| Tap water, drinking water       | -                                                                                        | -                                 |
| Confectionary                   | 0.02                                                                                     | -                                 |
| RTE savouries                   | 0.02                                                                                     | -                                 |

| <b>Food Category</b>                         | <b>Dioxins and dioxin-like PCBs<br/>(sum of PCDDs, PCDFs, dioxin-like PCBs)<br/>[pg TEQ/g fw]</b> | <b>Perfluorinated<br/>compounds [ppb]</b> |
|----------------------------------------------|---------------------------------------------------------------------------------------------------|-------------------------------------------|
| <b>Fungi, seaweed</b>                        | -                                                                                                 | -                                         |
| <b>Nuts and seeds<br/>(including spices)</b> | 0.01                                                                                              | -                                         |
| <b>Vegetable<br/>protein</b>                 | -                                                                                                 | -                                         |
| <b>Brassica<br/>vegetables</b>               | -                                                                                                 | -                                         |
| <b>Fruiting<br/>vegetables</b>               | -                                                                                                 | -                                         |
| <b>Leafy vegetables,<br/>herbs</b>           | -                                                                                                 | -                                         |
| <b>Legumes</b>                               | -                                                                                                 | -                                         |
| <b>Root and tubers</b>                       | -                                                                                                 | -                                         |
| <b>Stalk, stem and<br/>bulb vegetables</b>   | -                                                                                                 | -                                         |
| <b>Sauces and<br/>condiments</b>             | 0.02                                                                                              | -                                         |
| <b>Composite foods</b>                       | 0.01                                                                                              | -                                         |

**Table S15.** Mean concentrations of food contact chemicals, in ppm, for each food category in Singapore's TDS

| Food Category                     | Mean concentration [ppm] |              |
|-----------------------------------|--------------------------|--------------|
|                                   | Bisphenols               | Plasticisers |
| Beverages                         | 0.019                    | -            |
| Bakery products                   | 0.002                    | -            |
| Fish and seafood                  | 0.026                    | 0.120        |
| Grains and grain-based products   | 0.017                    | -            |
| Meat and meat products            | 0.009                    | 0.110        |
| Eggs and egg products             | -                        | -            |
| Fats and oils                     | 0.009                    | -            |
| Milk and dairy products           | 0.008                    | 0.170        |
| Fruit and fruit products          | 0.016                    | 0.220        |
| Tap water, drinking water         | -                        | -            |
| Confectionary                     | 0.012                    | 0.100        |
| RTE savouries                     | 0.024                    | -            |
| Fungi, seaweed                    | 0.007                    | -            |
| Nuts and seeds (including spices) | 0.003                    | -            |
| Vegetable protein                 | 0.021                    | -            |
| Brassica vegetables               | 0.003                    | -            |
| Fruiting vegetables               | 0.004                    | -            |

|                                 | Mean concentration [ppm] |       |
|---------------------------------|--------------------------|-------|
| Leafy vegetables, herbs         | 0.015                    | 0.110 |
| Legumes                         | 0.004                    | -     |
| Root and tubers                 | -                        | -     |
| Stalk, stem and bulb vegetables | 0.006                    | 0.130 |
| Sauces and condiments           | 0.075                    | -     |
| Composite foods                 | 0.011                    | -     |
